# Supplementary material for: Organizational readiness to implement bundled interventions to increase HIV linkage and retention in care and treatment: results from the Black Women First (BWF) initiative
Source: PubMed Central journal article supplement — BMC Health Serv Res. 2024 Oct 13;24:1226. doi: 10.1186/s12913-024-11568-x (PMC11472514; doi:10.1186/s12913-024-11568-x), 2024-10-13
Supplement: 12913_2024_11568_MOESM2_ESM.pdf [file 12913_2024_11568_MOESM2_ESM.pdf]

**Additional File 2. Least Squares Means at Baseline Nested by Site (N=97)**

|                                                                    | Overall ORIC <sup>a</sup> (N=88) <sup>b</sup> |        |                 |         | Change efficacy (N=88) <sup>b</sup> |        |                 |         | Change commitment (N=80) <sup>c</sup> |        |                 |         |
|--------------------------------------------------------------------|-----------------------------------------------|--------|-----------------|---------|-------------------------------------|--------|-----------------|---------|---------------------------------------|--------|-----------------|---------|
|                                                                    | n                                             | Means  | SE <sup>d</sup> | p-value | n                                   | Means  | SE <sup>d</sup> | p-value | n                                     | Means  | SE <sup>d</sup> | p-value |
| <b>Age (years)</b>                                                 |                                               |        |                 | 0.429   |                                     |        |                 | 0.396   |                                       |        |                 | 0.594   |
| 18-34                                                              | 20                                            | 55.267 | 1.240           |         | 20                                  | 31.735 | 0.817           |         | 18                                    | 23.333 | 0.533           |         |
| 35-44                                                              | 25                                            | 55.912 | 1.121           |         | 25                                  | 32.075 | 0.744           |         | 23                                    | 23.696 | 0.471           |         |
| 45-54                                                              | 24                                            | 55.024 | 1.156           |         | 24                                  | 31.463 | 0.762           |         | 22                                    | 23.429 | 0.493           |         |
| 55-64                                                              | 14                                            | 58.495 | 1.472           |         | 14                                  | 33.848 | 0.964           |         | 12                                    | 24.583 | 0.652           |         |
| 65 and older                                                       | 5                                             | 56.251 | 2.451           |         | 5                                   | 32.017 | 1.600           |         | 5                                     | 24.200 | 1.010           |         |
| <b>Role</b>                                                        |                                               |        |                 | 0.144   |                                     |        |                 | 0.298   |                                       |        |                 | 0.056   |
| Community health worker/Peer navigator/Advocate /Patient navigator | 18                                            | 54.727 | 1.271           |         | 18                                  | 31.323 | 0.849           |         | 16                                    | 23.188 | 0.536           |         |
| Case manager/ Social worker                                        | 10                                            | 57.728 | 1.710           |         | 10                                  | 33.245 | 1.147           |         | 9                                     | 24.444 | 0.715           |         |
| Mental health/ Primary care provider                               | 9                                             | 52.178 | 1.798           |         | 9                                   | 30.198 | 1.201           |         | 8                                     | 21.625 | 0.758           |         |
| Administrator                                                      | 38                                            | 56.857 | 0.902           |         | 38                                  | 32.578 | 0.617           |         | 35                                    | 24.177 | 0.368           |         |
| Evaluator/Quality improvement manager                              | 13                                            | 56.445 | 1.495           |         | 13                                  | 32.408 | 0.998           |         | 12                                    | 23.917 | 0.619           |         |

|                                                          |    |        |       |       |    |        |       |       |    |        |       |       |
|----------------------------------------------------------|----|--------|-------|-------|----|--------|-------|-------|----|--------|-------|-------|
| <b>Length in this role</b>                               |    |        |       | 0.147 |    |        |       | 0.147 |    |        |       | 0.378 |
| <1 year                                                  | 16 | 57.916 | 1.410 |       | 16 | 33.379 | 0.929 |       | 13 | 24.308 | 0.622 |       |
| 1-5 years                                                | 26 | 54.391 | 1.151 |       | 26 | 31.070 | 0.764 |       | 25 | 23.240 | 0.448 |       |
| More than 5 years                                        | 45 | 56.177 | 0.912 |       | 45 | 32.215 | 0.610 |       | 41 | 23.805 | 0.350 |       |
| <b>Length in the organization</b>                        |    |        |       | 0.923 |    |        |       | 0.948 |    | 23.500 | 0.565 | 0.715 |
| <1 year                                                  | 20 | 56.172 | 1.288 |       | 20 | 32.329 | 0.854 |       | 16 | 23.500 | 0.462 |       |
| 1-5 years                                                | 25 | 55.604 | 1.172 |       | 25 | 31.979 | 0.780 |       | 24 | 23.923 | 0.362 |       |
| More than 5 years                                        | 43 | 56.105 | 0.923 |       | 43 | 32.088 | 0.618 |       | 40 |        |       |       |
| <b>Organization type</b>                                 |    |        |       | 0.087 |    |        |       | 0.146 |    |        |       | 0.115 |
| Health center/Hospital                                   | 20 | 53.308 | 1.256 |       | 20 | 30.587 | 0.831 |       | 20 | 22.700 | 0.490 |       |
| AIDS service organization                                | 17 | 56.430 | 1.361 |       | 17 | 32.528 | 0.900 |       | 16 | 23.938 | 0.548 |       |
| Community based organization/<br>Health department/Other | 51 | 56.880 | 0.849 |       | 51 | 32.573 | 0.564 |       | 44 | 24.093 | 0.334 |       |

<sup>a</sup>ORIC – Organizational Readiness for Implementing Change.

<sup>b</sup> Site C and Site F were not included in the mixed model to estimate least squares means.

<sup>c</sup>Site C, Site F, and Site J were not included in the mixed model to estimate least squares means.

<sup>d</sup>SE – Standard errors.
