# Supplementary material for: Organizational readiness to implement bundled interventions to increase HIV linkage and retention in care and treatment: results from the Black Women First (BWF) initiative
Source: PubMed Central journal article supplement — BMC Health Serv Res. 2024 Oct 13;24:1226. doi: 10.1186/s12913-024-11568-x (PMC11472514; doi:10.1186/s12913-024-11568-x), 2024-10-13
Supplement: 12913_2024_11568_MOESM3_ESM.pdf [file 12913_2024_11568_MOESM3_ESM.pdf]

**Additional File 3. Least Squares Means at 6-month Nested by Site (N=109)**

|                                                                   | Overall ORIC <sup>a</sup> (N=109) |        |                 |         | Change efficacy (N=109) |        |                 |         | Change commitment (N=102) <sup>b</sup> |        |                 |         |
|-------------------------------------------------------------------|-----------------------------------|--------|-----------------|---------|-------------------------|--------|-----------------|---------|----------------------------------------|--------|-----------------|---------|
|                                                                   | n                                 | Means  | SE <sup>c</sup> | p-value | n                       | Means  | SE <sup>c</sup> | p-value | n                                      | Means  | SE <sup>c</sup> | p-value |
| <b>Age (years)</b>                                                |                                   |        |                 | 0.070   |                         |        |                 | 0.154   |                                        |        |                 | 0.119   |
| 18-34                                                             | 27                                | 56.619 | 1.135           |         | 27                      | 32.494 | 0.738           |         | 25                                     | 24.000 | 0.519           |         |
| 35-44                                                             | 36                                | 56.014 | 0.980           |         | 36                      | 32.194 | 0.638           |         | 35                                     | 23.800 | 0.439           |         |
| 45-54                                                             | 24                                | 52.727 | 1.208           |         | 24                      | 30.442 | 0.784           |         | 24                                     | 22.417 | 0.530           |         |
| 55-64                                                             | 17                                | 58.315 | 1.465           |         | 17                      | 33.604 | 0.938           |         | 14                                     | 24.571 | 0.694           |         |
| 65 and older                                                      | 5                                 | 55.016 | 2.764           |         | 5                       | 31.935 | 1.744           |         | 4                                      | 22.750 | 1.298           |         |
| <b>Role</b>                                                       |                                   |        |                 | 0.007   |                         |        |                 | 0.006   |                                        |        |                 | 0.020   |
| Community health worker/Peer navigator/Advocate/Patient navigator | 25                                | 57.524 | 1.184           |         | 25                      | 33.516 | 0.745           |         | 22                                     | 23.864 | 0.537           |         |
| Case manager/Social worker                                        | 12                                | 49.906 | 1.710           |         | 12                      | 28.758 | 1.075           |         | 12                                     | 21.167 | 0.727           |         |
| Mental health/Primary care provider                               | 10                                | 53.275 | 1.877           |         | 10                      | 30.314 | 1.176           |         | 9                                      | 22.778 | 0.840           |         |
| Administrator                                                     | 31                                | 57.185 | 1.059           |         | 31                      | 32.926 | 0.671           |         | 30                                     | 24.200 | 0.460           |         |
| Evaluator/Quality improvement manager                             | 19                                | 54.960 | 1.361           |         | 19                      | 31.208 | 0.854           |         | 18                                     | 23.667 | 0.594           |         |
| Other                                                             | 12                                | 57.783 | 1.715           |         | 12                      | 33.276 | 1.073           |         | 11                                     | 24.546 | 0.760           |         |

|                                                      |    |        |       |       |    |        |       |       |    |        |       |       |
|------------------------------------------------------|----|--------|-------|-------|----|--------|-------|-------|----|--------|-------|-------|
| <b>Length in this role</b>                           |    |        |       | 0.406 |    |        |       | 0.401 |    |        |       | 0.468 |
| <1 year                                              | 16 | 57.440 | 1.602 |       | 16 | 33.077 | 1.009 |       | 15 | 24.333 | 0.685 |       |
| 1-5 years                                            | 41 | 56.089 | 1.023 |       | 41 | 32.379 | 0.654 |       | 38 | 23.605 | 0.431 |       |
| More than 5 years                                    | 52 | 55.051 | 0.921 |       | 52 | 31.632 | 0.594 |       | 49 | 23.347 | 0.379 |       |
| <b>Length in the organization</b>                    |    |        |       | 0.883 |    |        |       | 0.848 |    |        |       | 0.907 |
| <1 year                                              | 19 | 55.370 | 1.480 |       | 19 | 31.705 | 0.935 |       | 19 | 23.684 | 0.613 |       |
| 1-5 years                                            | 39 | 55.583 | 1.047 |       | 39 | 32.086 | 0.672 |       | 37 | 23.432 | 0.439 |       |
| More than 5 years                                    | 51 | 56.112 | 0.930 |       | 51 | 32.319 | 0.604 |       | 46 | 23.674 | 0.394 |       |
| <b>Organization type</b>                             |    |        |       | 0.321 |    |        |       | 0.215 |    |        |       | 0.867 |
| Health center/Hospital                               | 25 | 56.214 | 1.346 |       | 25 | 32.461 | 0.859 |       | 25 | 23.760 | 0.534 |       |
| AIDS service organization                            | 20 | 57.677 | 1.496 |       | 20 | 33.527 | 0.952 |       | 14 | 23.786 | 0.714 |       |
| Community based organization/Health department/Other | 64 | 55.065 | 0.884 |       | 64 | 31.585 | 0.577 |       | 63 | 23.476 | 0.337 |       |

<sup>a</sup>ORIC – Organizational Readiness for Implementing Change.

<sup>b</sup>Site C was not included in the mixed model to estimate least squares means.

<sup>c</sup>SE – Standard errors.
