# Supplementary material for: Organizational readiness to implement bundled interventions to increase HIV linkage and retention in care and treatment: results from the Black Women First (BWF) initiative
Source: PubMed Central journal article supplement — BMC Health Serv Res. 2024 Oct 13;24:1226. doi: 10.1186/s12913-024-11568-x (PMC11472514; doi:10.1186/s12913-024-11568-x), 2024-10-13
Supplement: 12913_2024_11568_MOESM4_ESM.pdf [file 12913_2024_11568_MOESM4_ESM.pdf]

**Additional File 4. Least Squares Means at 12-month Nested by Site (N=59)**

|                                                                   | Overall ORIC <sup>a</sup> (N=54) <sup>b</sup> |        |                 |         | Change efficacy (N=54) <sup>b</sup> |        |                 |         | Change commitment (N=50) <sup>c</sup> |        |                 |         |
|-------------------------------------------------------------------|-----------------------------------------------|--------|-----------------|---------|-------------------------------------|--------|-----------------|---------|---------------------------------------|--------|-----------------|---------|
|                                                                   | n                                             | Means  | SE <sup>d</sup> | p-value | n                                   | Means  | SE <sup>d</sup> | p-value | n                                     | Means  | SE <sup>d</sup> | p-value |
| <b>Age (years)</b>                                                |                                               |        |                 | 0.163   |                                     |        |                 | 0.184   |                                       |        |                 | 0.393   |
| 18-34                                                             | 10                                            | 53.946 | 2.375           |         |                                     | 30.681 | 1.477           |         | 8                                     | 23.375 | 0.954           |         |
| 35-44                                                             | 17                                            | 57.212 | 1.947           |         |                                     | 32.984 | 1.212           |         | 17                                    | 24.118 | 0.655           |         |
| 45-54                                                             | 12                                            | 54.207 | 2.099           |         |                                     | 31.225 | 1.306           |         | 12                                    | 23.333 | 0.779           |         |
| 55-64                                                             | 13                                            | 55.913 | 2.022           |         |                                     | 32.283 | 1.258           |         | 11                                    | 23.182 | 0.814           |         |
| 65 and older                                                      | 2                                             | 47.748 | 4.056           |         |                                     | 27.595 | 2.520           |         | 2                                     | 20.000 | 1.909           |         |
| <b>Role</b>                                                       |                                               |        |                 | 0.153   |                                     |        |                 | 0.200   |                                       |        |                 | 0.172   |
| Community health worker/Peer navigator/Advocate/Patient navigator | 10                                            | 54.540 | 2.154           |         |                                     | 31.098 | 1.341           |         | 8                                     | 23.125 | 0.922           |         |
| Case manager/Social worker                                        | 4                                             | 48.547 | 3.011           |         |                                     | 28.357 | 1.878           |         | 4                                     | 20.000 | 1.303           |         |
| Mental health/Primary care provider                               | 5                                             | 59.290 | 2.802           |         |                                     | 34.150 | 1.747           |         | 5                                     | 24.800 | 1.166           |         |
| Administrator                                                     | 18                                            | 56.431 | 1.924           |         |                                     | 32.856 | 1.196           |         | 17                                    | 23.647 | 0.632           |         |
| Evaluator/Quality improvement manager                             | 12                                            | 55.338 | 2.070           |         |                                     | 31.469 | 1.288           |         | 12                                    | 23.667 | 0.753           |         |
| Other                                                             | 5                                             | 56.205 | 2.947           |         |                                     | 32.103 | 1.838           |         | 4                                     | 24.250 | 1.303           |         |

|                                                      |    |        |       |       |  |        |       |       |    |        |       |       |
|------------------------------------------------------|----|--------|-------|-------|--|--------|-------|-------|----|--------|-------|-------|
| <b>Length in this role</b>                           |    |        |       | 0.807 |  |        |       | 0.822 |    |        |       | 0.917 |
| <1 year                                              | 10 | 56.378 | 2.232 |       |  | 32.331 | 1.376 |       | 9  | 23.667 | 0.921 |       |
| 1-5 years                                            | 16 | 55.187 | 1.957 |       |  | 31.984 | 1.204 |       | 16 | 23.563 | 0.691 |       |
| More than 5 years                                    | 28 | 54.994 | 1.656 |       |  | 31.548 | 1.017 |       | 25 | 23.280 | 0.553 |       |
| <b>Length in the organization</b>                    |    |        |       | 0.516 |  |        |       | 0.564 |    |        |       | 0.280 |
| <1 year                                              | 9  | 53.368 | 2.237 |       |  | 30.622 | 1.385 |       | 8  | 22.250 | 0.950 |       |
| 1-5 years                                            | 17 | 56.168 | 1.841 |       |  | 32.065 | 1.138 |       | 17 | 24.177 | 0.652 |       |
| More than 5 years                                    | 28 | 55.378 | 1.585 |       |  | 32.028 | 0.979 |       | 25 | 23.320 | 0.538 |       |
| <b>Organization type</b>                             |    |        |       | 0.843 |  |        |       | 0.813 |    |        |       | 0.651 |
| Health center/Hospital                               | 16 | 55.960 | 1.951 |       |  | 32.180 | 1.208 |       | 12 | 24.000 | 0.792 |       |
| AIDS service organization                            | 9  | 54.548 | 2.347 |       |  | 31.181 | 1.452 |       | 9  | 23.667 | 0.914 |       |
| Community based organization/Health department/Other | 29 | 55.083 | 1.632 |       |  | 31.743 | 1.012 |       | 29 | 23.138 | 0.509 |       |

<sup>a</sup>ORIC – Organizational Readiness for Implementing Change.

<sup>b</sup>Site C was not included in the mixed model to estimate least squares means.

<sup>c</sup>Site C and Site G were not included in the mixed model to estimate least squares means.

<sup>d</sup>SE – Standard errors.
